# Supplementary material for: Data and care integration for post-acute intensive care program of stroke patients: effectiveness assessment using a disease-matched comparator cohort
Source: bioRxiv or medRxiv preprint supplement (doi:10.1101/2022.04.13.22273573), 2022-04-18

**Data and care integration for post-acute rehabilitation of stroke patients:  
effectiveness assessment using a disease-matched comparator cohort**

Supplementary appendix

**Figure S1.** Flow-chart of the integrated care intervention

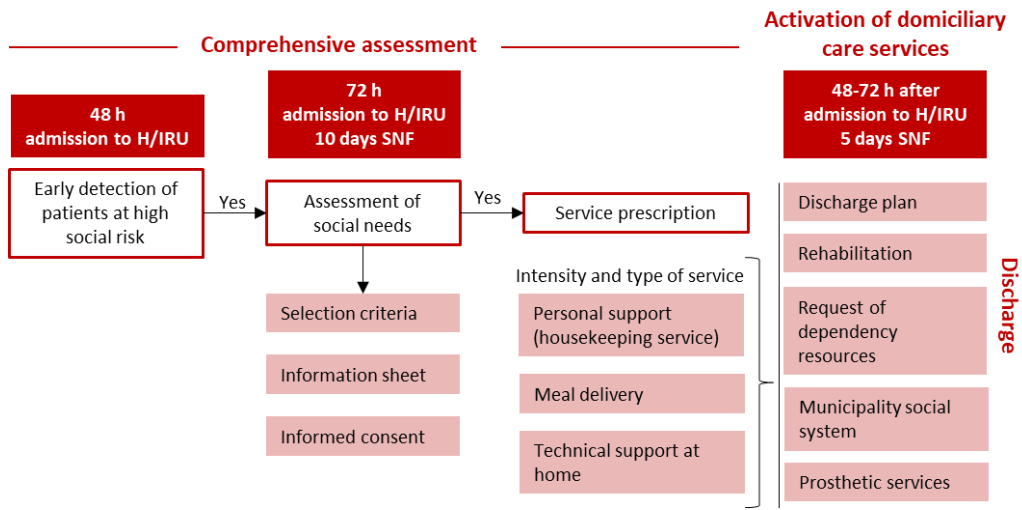

**H:** Hospital. **IRU:** Intensive rehabilitation unit. **SNF:** skilled nursing facility

**Table S1.** Social and health care expenditure after discharge

| Period      | Group        | Health care expenditure |                        |          |       | Total<br>Healthcare | Social care<br>expenditure | Total<br>expenditure |
|-------------|--------------|-------------------------|------------------------|----------|-------|---------------------|----------------------------|----------------------|
|             |              | Outpatient<br>resources | Inpatient<br>resources | Pharmacy | Other |                     |                            |                      |
| Months 1-12 | Control      | 117.48                  | 398.54                 | 110.46   | 29.06 | 655.54              | 145.63                     | <b>801.17</b>        |
|             | Intervention | 132.94                  | 425.88                 | 96.19    | 81.00 | 736.01              | 251.01                     | <b>987.02</b>        |
| Months 2-12 | Control      | 112.49                  | 248.65                 | 110.04   | 29.56 | 500.75              | 156.40                     | <b>657.15</b>        |
|             | Intervention | 133.10                  | 211.90                 | 97.87    | 83.77 | 526.64              | 257.95                     | <b>784.58</b>        |

**Figure S2.** Monthly use of resources within the 24 months following discharge in the integrated care (intervention) group (A) and population-based control group (B).

**Domiciliary rehabilitation**

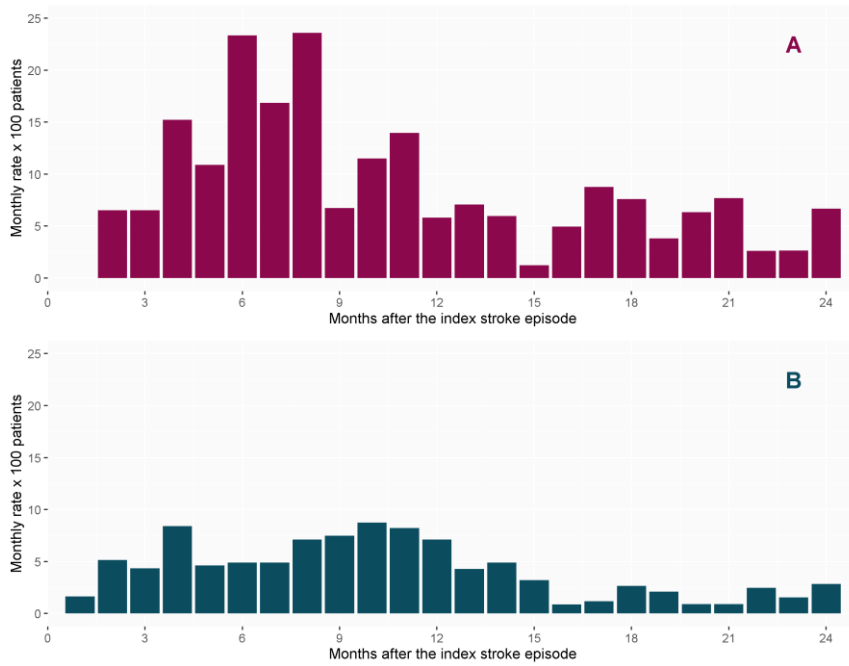

**Emergency hospital admissions**

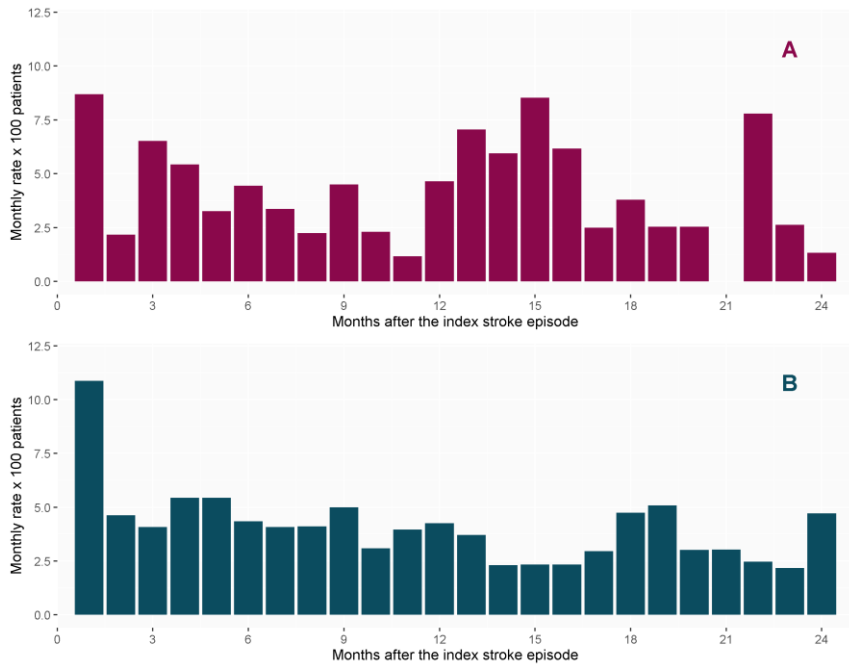

## Admissions to the emergency department

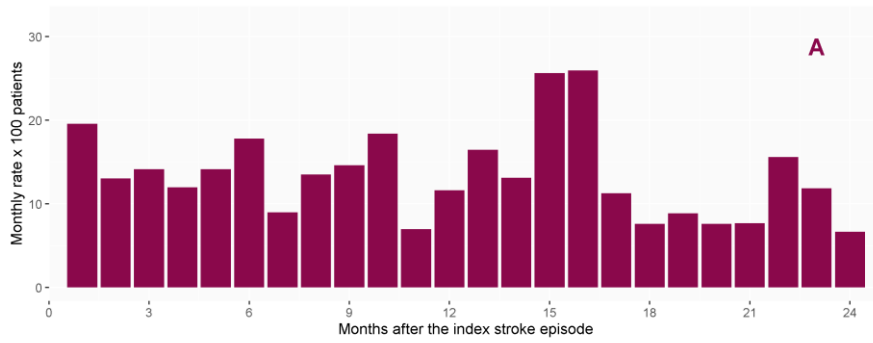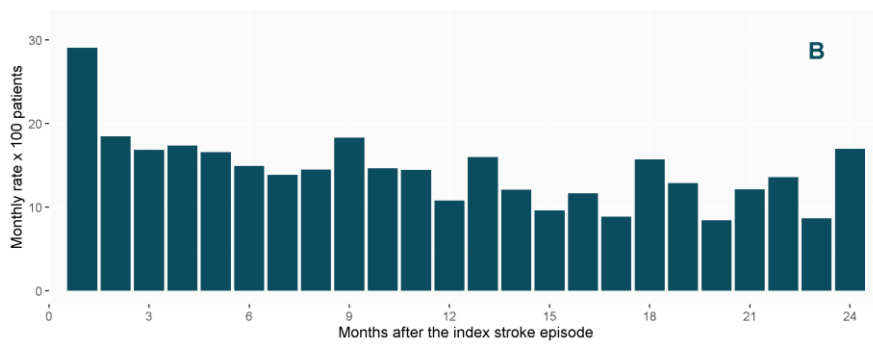

## Non-emergency medical transport rides

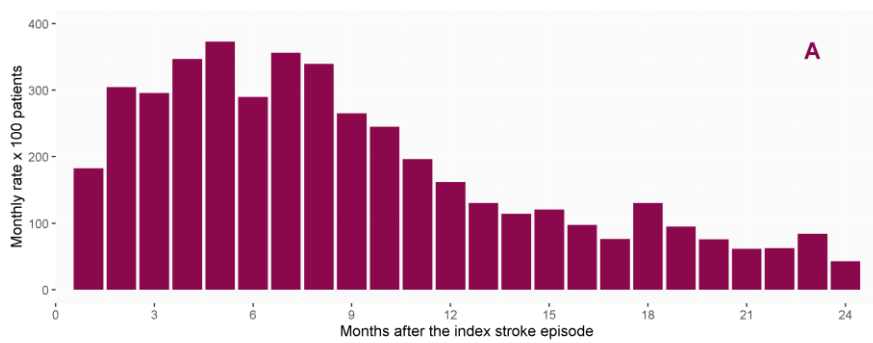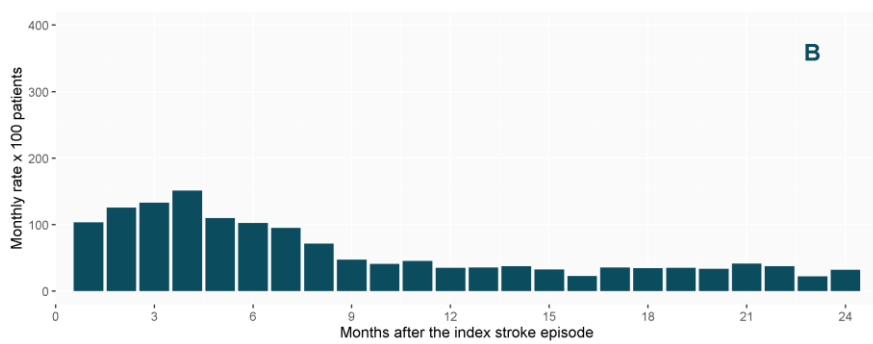

### Visits to primary care nurse staff

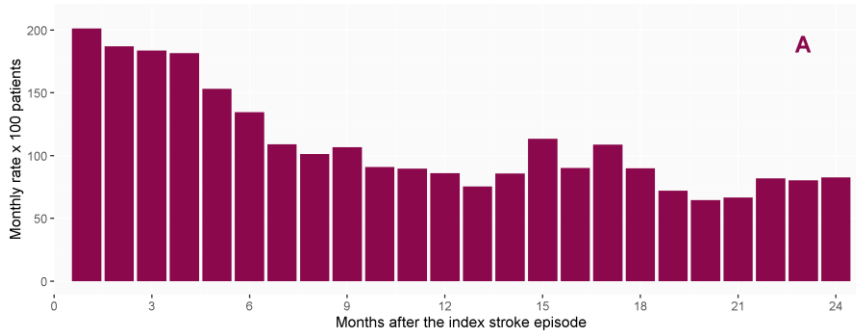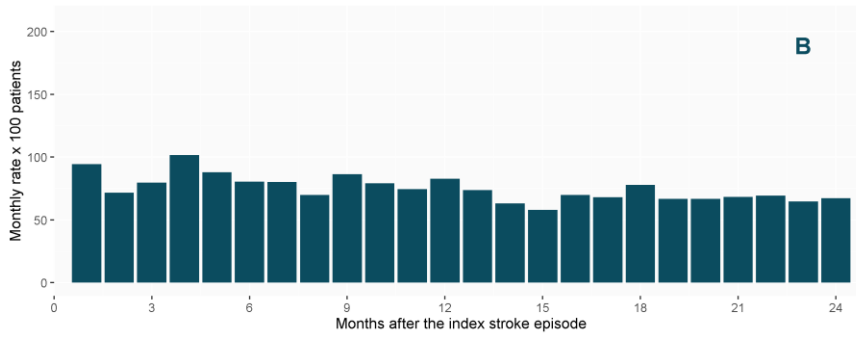

### Visits to primary care social worker

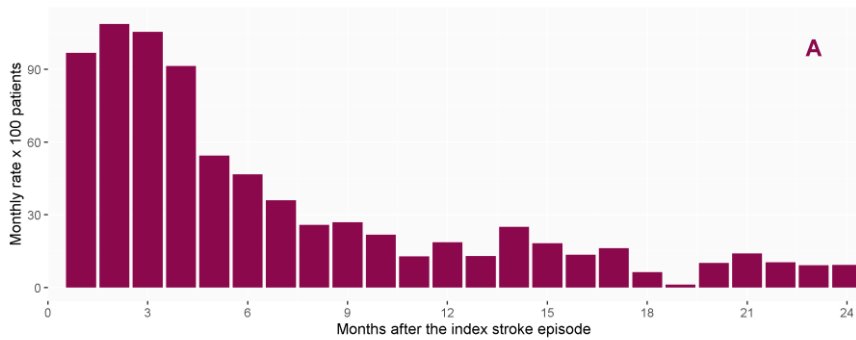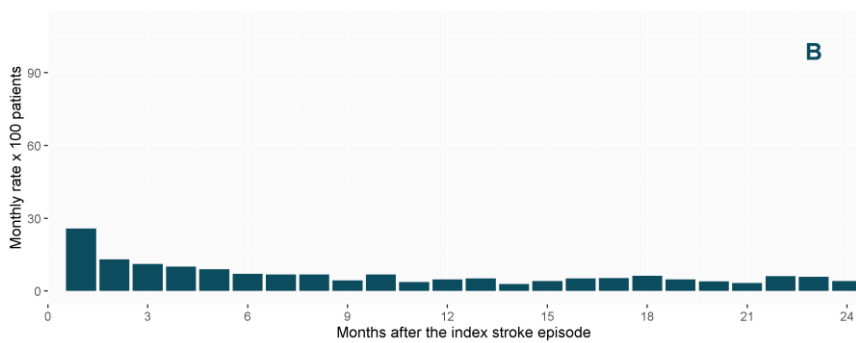

## Hospital admissions

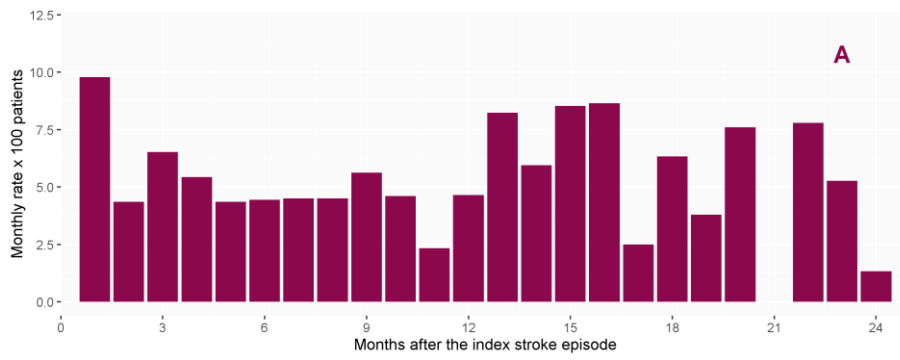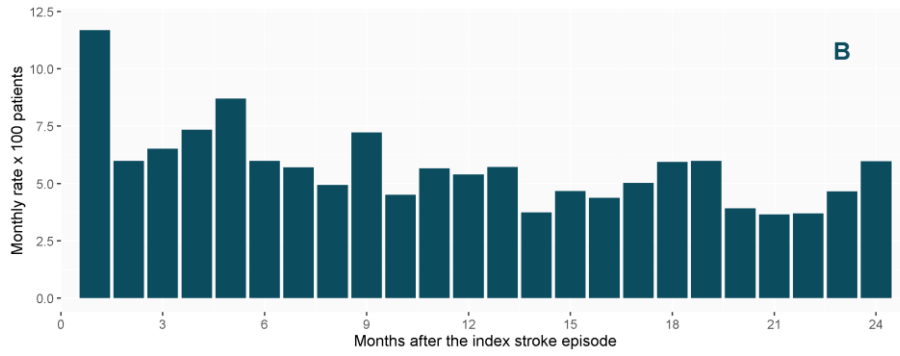

## Primary care visits

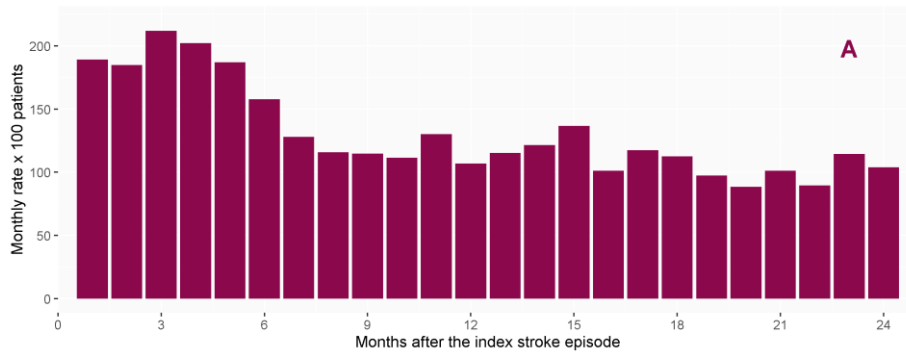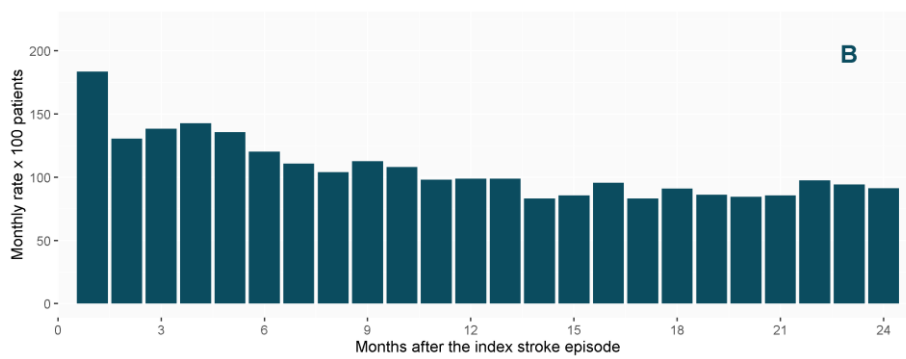

## Visits to the general practitioner

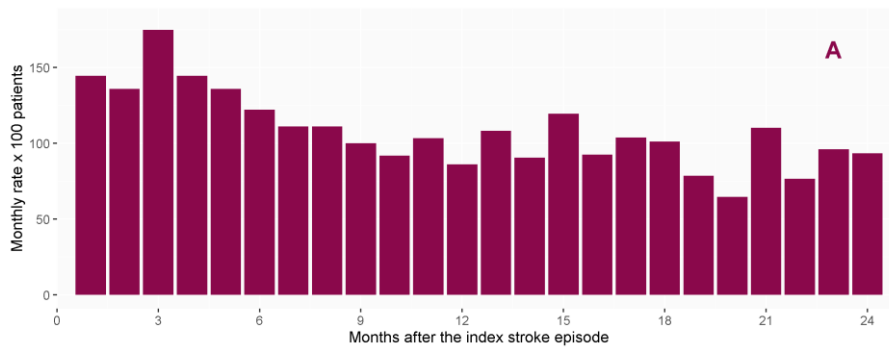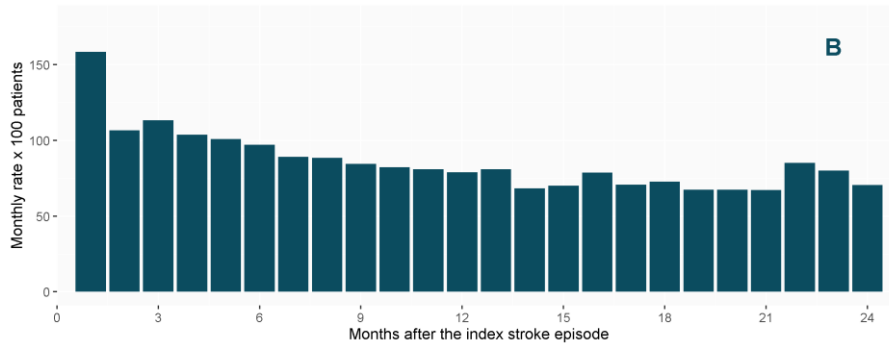

## Pharmacy (dispensed packages)

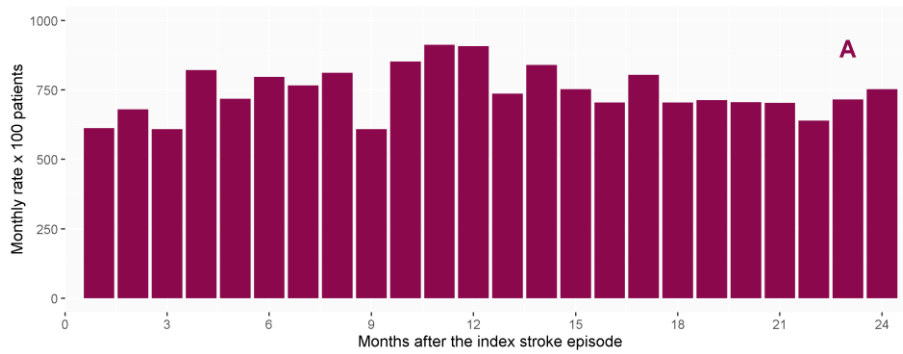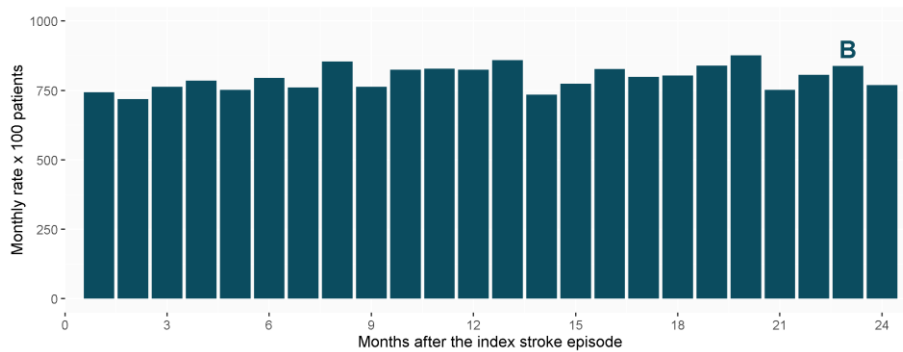



## Remote consultations

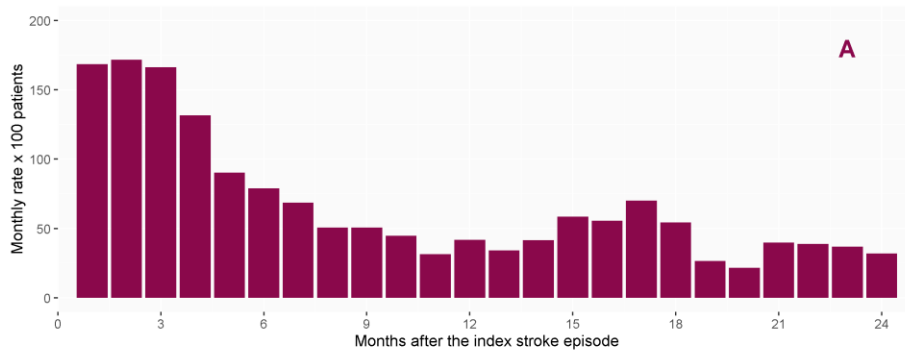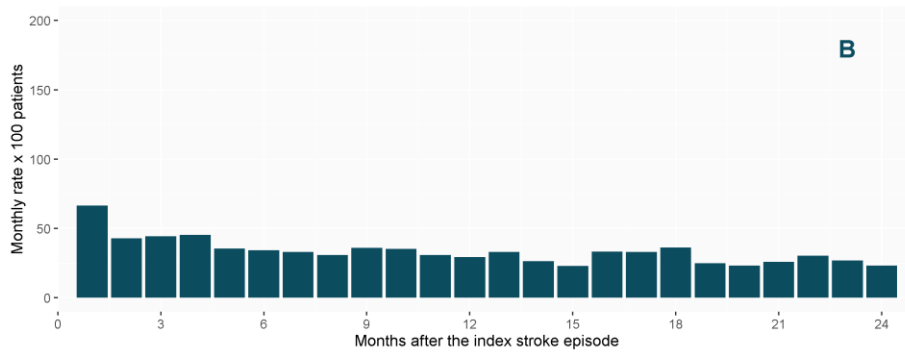

## Visits to the primary care center

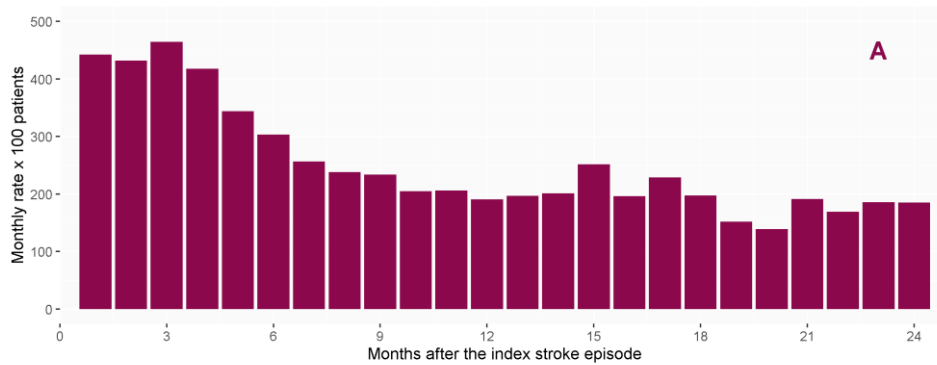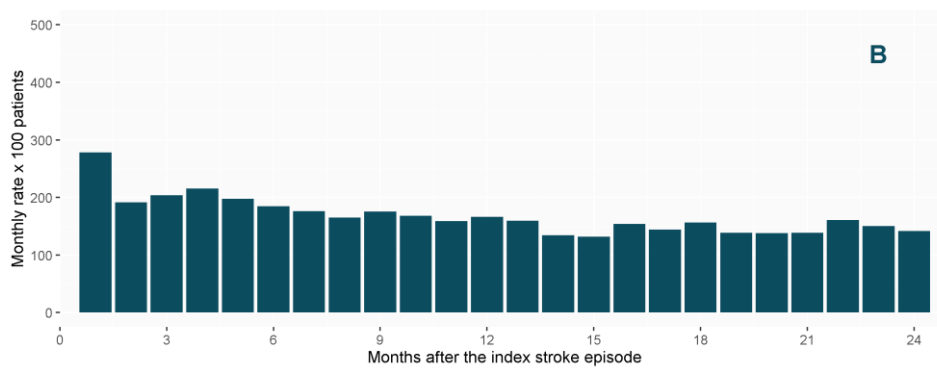

## Home care (primary care team) visits

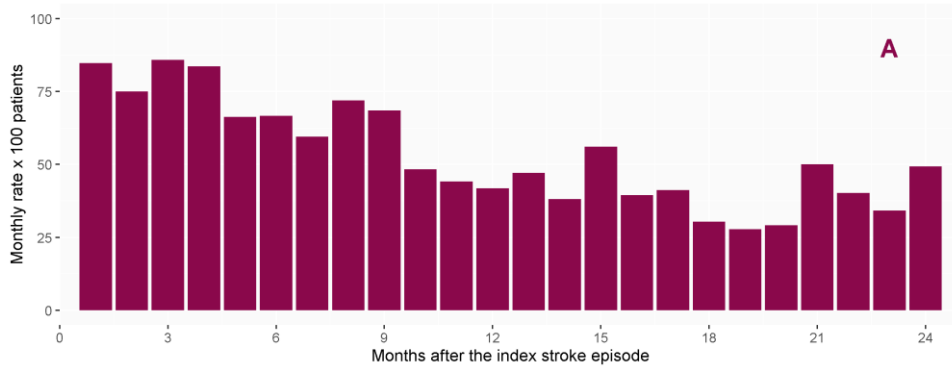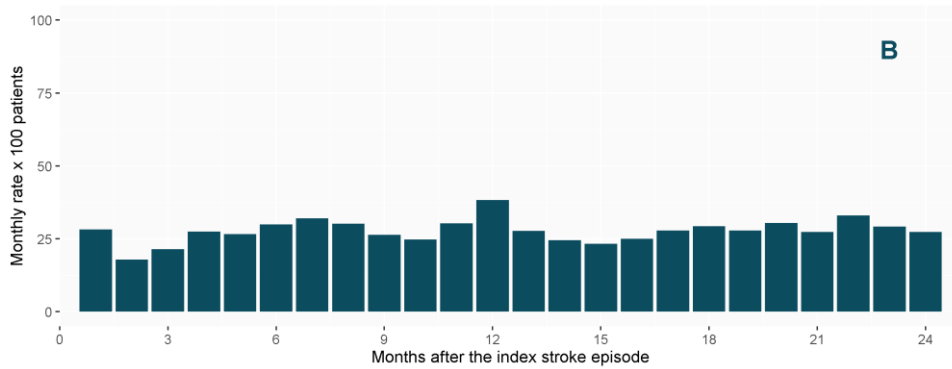

## Outpatient visits

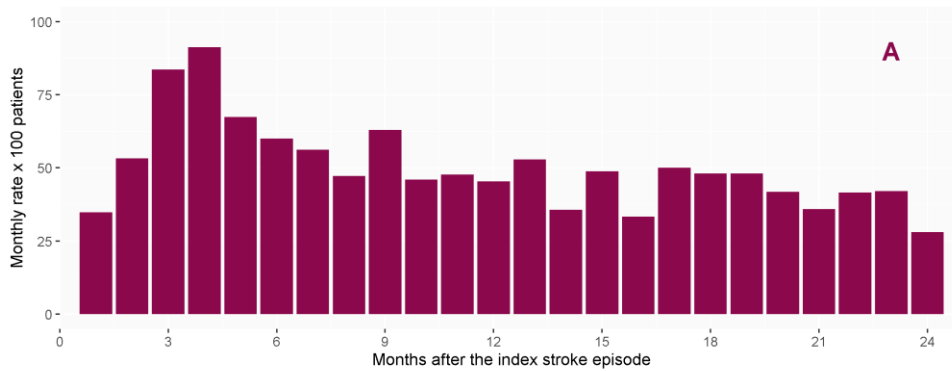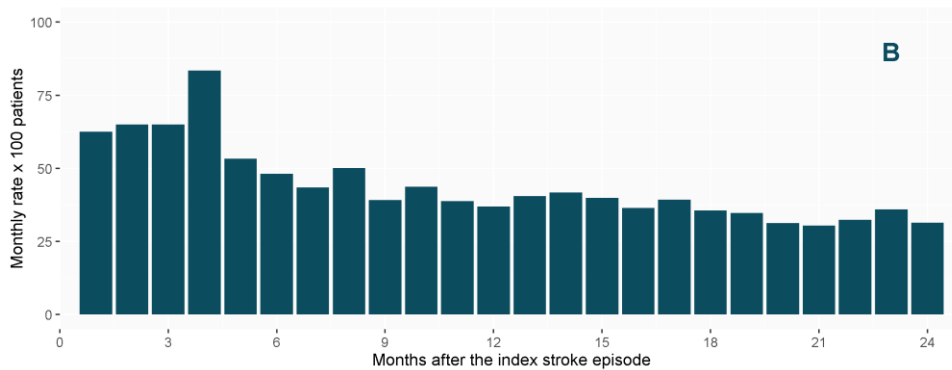

Supplement: Supplementary file [file media-1.pdf]
